# Supplementary material for: An overview of the BIOASQ large-scale biomedical semantic indexing and question answering competition
Source: PubMed Central journal article supplement (PMC4450488; doi:10.1186/s12859-015-0564-6), 2015-04-30

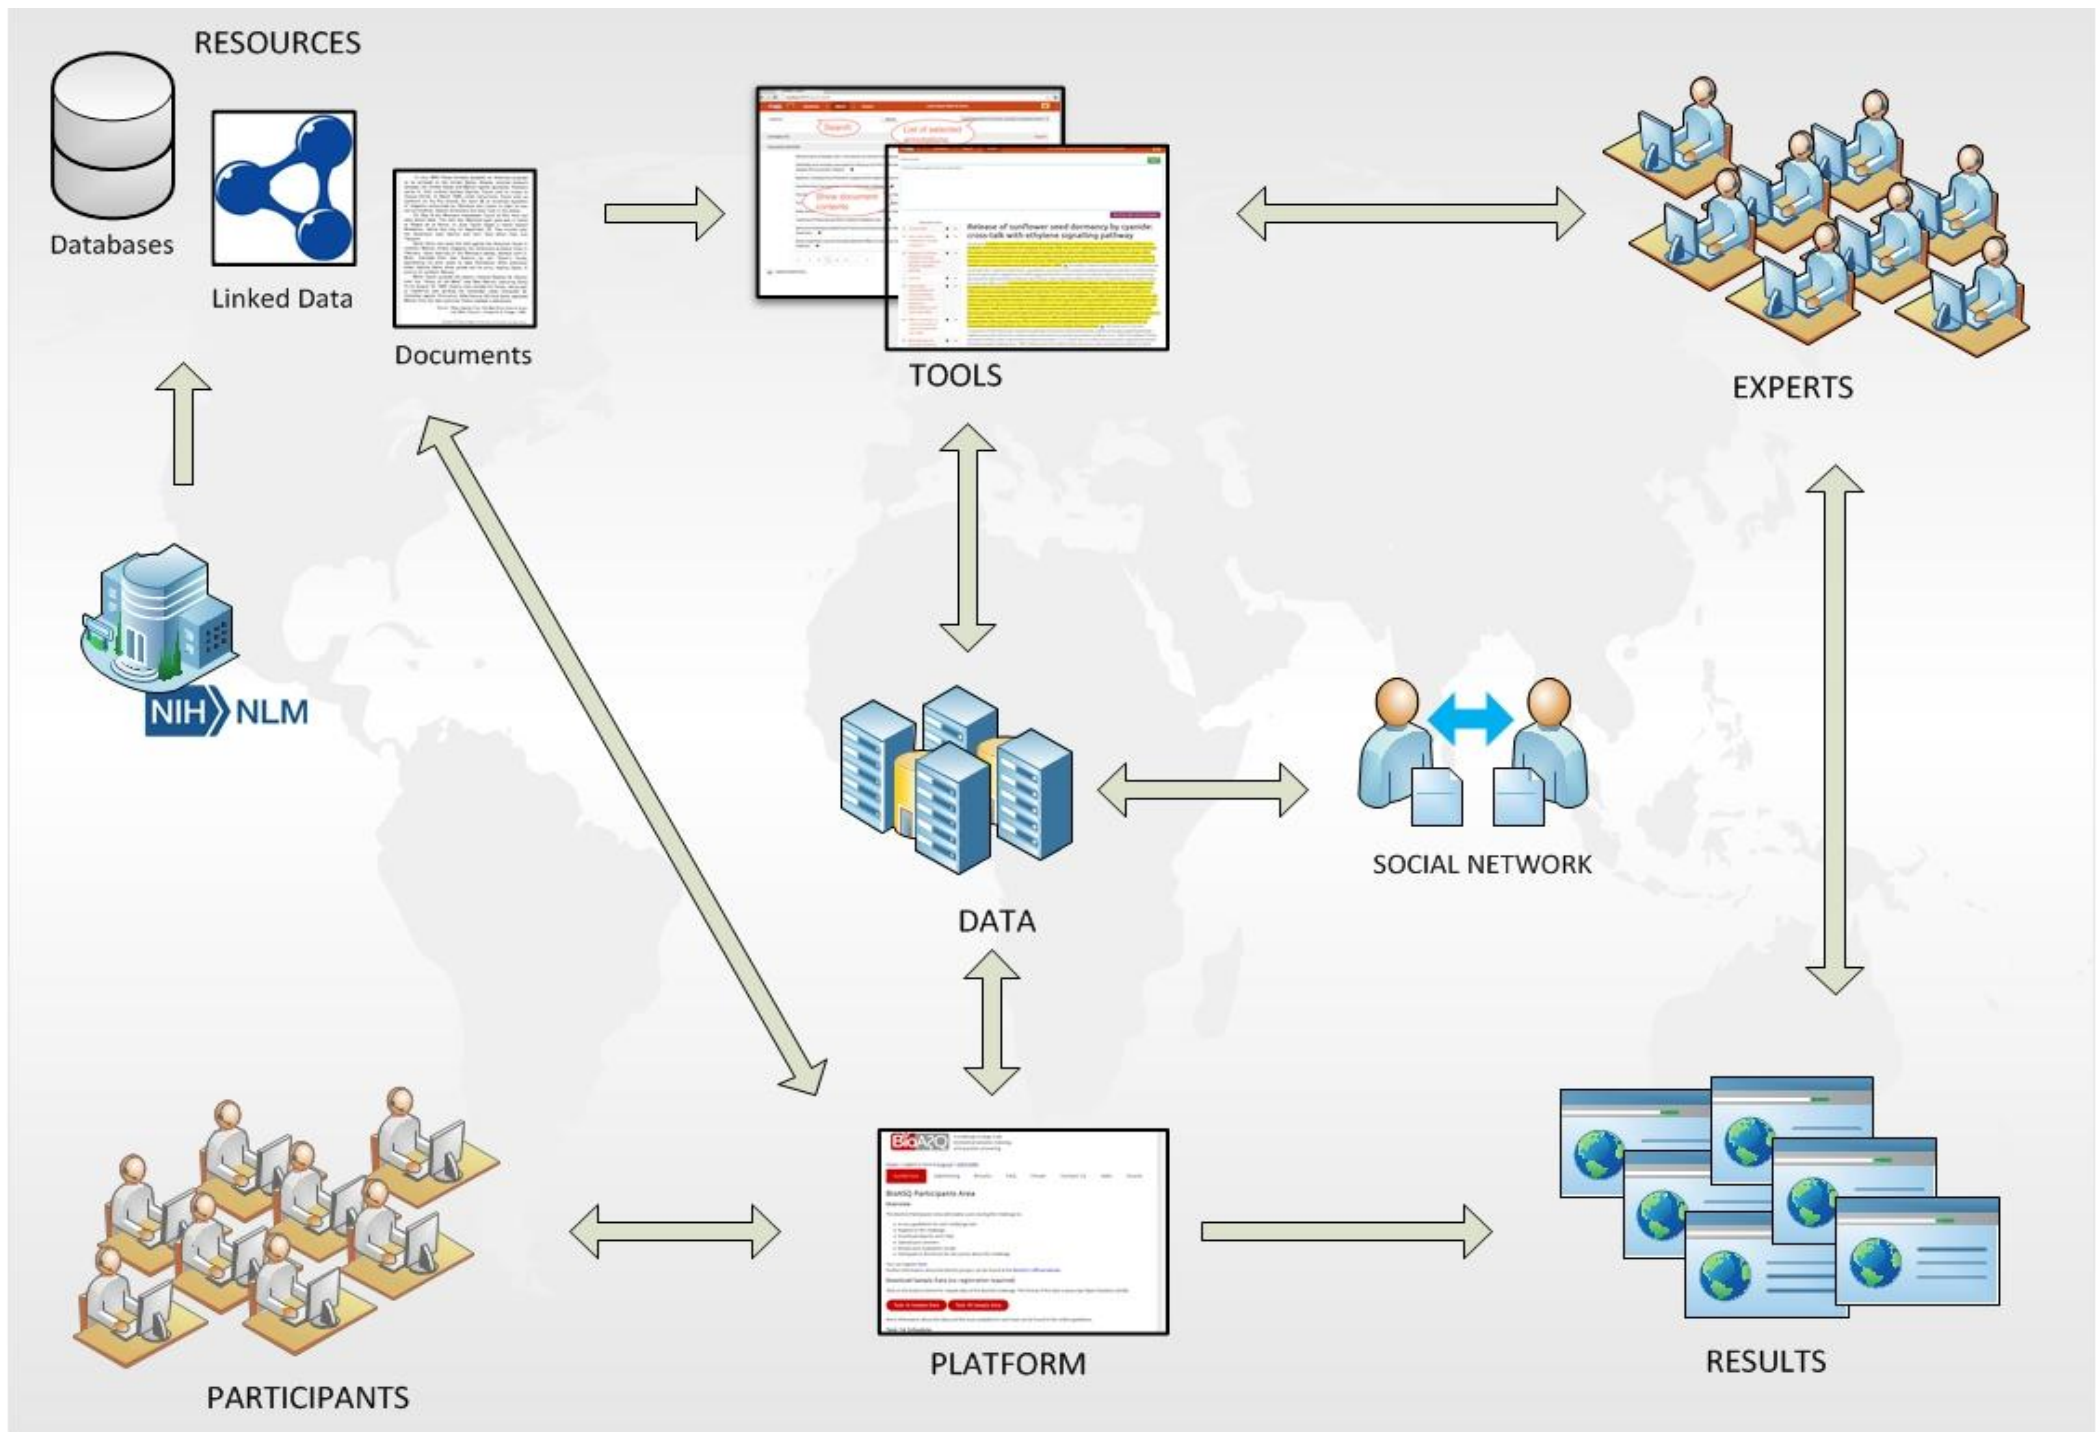

Supplement: 12859_2015_564_MOESM4_ESM.pdf [file 12859_2015_564_MOESM4_ESM.pdf]
